# Supplementary material for: Arsenate Removal from the Groundwater Employing Maghemite Nanoparticles
Source: MDPI journal article supplement (doi:10.3390/w14223617), 2022-11-10
Supplement: s1 [file s1]

# Arsenate Removal from the Groundwater Employing Maghemite Nanoparticles

Ajay Kumar <sup>1,\*</sup>, Himanshu Joshi <sup>1</sup> and Anil Kumar <sup>2</sup><sup>1</sup> Department of Hydrology, Indian Institute of Technology, Roorkee 247667, Uttarakhand, India<sup>2</sup> Department of Chemistry, Indian Institute of Technology, Roorkee 247667, Uttarakhand, India

\* Correspondence: akumar1@hy.iitr.ac.in

## Text Section

### *Text S1. Operational details of XRD, Scanning Electron Microscopy, and High-Resolution Transmission Electron Microscopy*

Before the characterization, a fine-powdered XRD sample was prepared using an agate pestle and mortar. The sample was compacted in the aluminium rack (hollowed) and measured at 40 kV and 40 mA, for an angular range of 10° to 90° (2θ) and with a scanning speed of 0.01 deg min<sup>-1</sup>. Furthermore, the XRD data were smoothed with the subtraction of Kα<sub>2</sub> stripping followed by the background corrections. Then, the diffraction patterns were analysed for peak(s) identifications using several JCP-DS files available in the literature.

FE-SEM measurements for 3D imaging were taken with a gold sputtering of the powdered sample under vacuum conditions, primarily to increase the conductivity of the sample. Using a voltage of 15 kV, the images were recorded by an In-Lens detector with magnification and resolution values of 100 K and 7.9 mm, respectively.

HR-TEM imaging was performed by depositing the sample on a standard carbon-coated copper TEM grid (Mesh size: 200). Firstly, the sample's available amount (mg) was allowed to sonicate in water for 5 minutes at room temperature. Then, the grid preparation was performed by dipping the grid into a prepared colloidal solution of nanoparticles and drying at room temperature using forceps for further analysis. The high-resolution 3D images were recorded by applying an accelerating voltage of 200 keV and a beam current of 1 nA.

### *Text S2. Zeta-potential measurements and analyses of elements using ICP-MS and MP-AES*

The electrophoretic measurements were performed by dispersing the nanoparticles in the water through sonication at room temperature. Several colloidal solutions were prepared in the pH range of 2 to 10. The pH was adjusted using different molar per-chloric acid and liquid ammonia solutions. Then, the interaction potential of these solutions was measured using a folded type capillary cell (disposable) at a measurement position of 2 mm along with an average run of 20 for each sample.

The acid-digested samples were allowed to be filtered through a Whatman™ 42 cellulose filter before analysing heavy metals using ICP-MS equipped with quadrupole mass spectrometry Q-MS technique, which allows the instrument to analyse the samples with high accuracy. The detection limit for all heavy metals is in the µg L<sup>-1</sup> range.

To prepare the samples for arsenic determination using (ICP-MS), the samples were treated with potassium iodide (KI, 1.5 g/100 ml) and hydrochloric acid (HCl, 1 ml/100 ml) at least one hour prior to the analysis. For calibration, the arsenate stock standard solution was diluted with a solution containing KI and HCl with a percentage ratio of 15:10 to prepare the desired standards. The reaction between potassium iodide and hydrochloric acid generates iodine gas, reducing any As<sup>v</sup> to As<sup>iii</sup>. The reaction is mentioned below:

**Citation:** Kumar, A.; Joshi, H.; Kumar, A. Arsenate Removal from the Groundwater Employing Maghemite Nanoparticles. *Water* **2022**, *14*, 3617. <https://doi.org/10.3390/w14223617>

Academic Editors: David Polya, Sudhakar Rao, Saugata Datta, Devanita Ghosh and Laura Richards

Received: 15 June 2022

Accepted: 28 October 2022

Published: 10 November 2022

**Publisher's Note:** MDPI stays neutral with regard to jurisdictional claims in published maps and institutional affiliations.

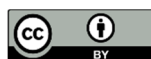

**Copyright:** © 2022 by the authors. Licensee MDPI, Basel, Switzerland. This article is an open access article distributed under the terms and conditions of the Creative Commons Attribution (CC BY) license (<https://creativecommons.org/licenses/by/4.0/>).

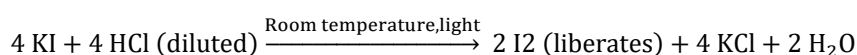

The vapor generation apparatus aspirated the sample through a standard nebulizer to microwave magnetically excited nitrogen plasma at a flow uptake of 1.4 ml min<sup>-1</sup>. The emission lines were recorded at two identical wavelengths of 193.695 nm and 234.984 nm.

#### Text S3. Spectrophotometric measurements for phosphates and silicates

The samples were filtered through a 0.45 µm-pore-diameter membrane filter to determine dissolved reactive phosphorous, which primarily measured the orthophosphates. The stannous chloride method was performed, and the developed colour was measured in a path length of 1 cm at a wavelength of 690 nm. The minimum detection limit is 0.01 PO<sub>4</sub><sup>3-</sup>-P mg L<sup>-1</sup>.

The typical aqueous phases of silica are H<sub>4</sub>SiO<sub>4</sub> and H<sub>3</sub>SiO<sub>4</sub><sup>-</sup>. The spectrophotometric measurements were performed at a wavelength of 410 nm for a light path length of 1 cm using the molybdo-silicate method. The minimum detection limit is 0.04 SiO<sub>2</sub> mg L<sup>-1</sup>.

## Tables

**Table S1.** Elements contributed to the formulation of artificial water.

| Element                  | Location I                                     |                                   |                                                      |           | Location II                                    |                                   |                                              |           |
|--------------------------|------------------------------------------------|-----------------------------------|------------------------------------------------------|-----------|------------------------------------------------|-----------------------------------|----------------------------------------------|-----------|
|                          | Actual groundwater conc. (mg L <sup>-1</sup> ) | Calculated values from the matrix | Measured synthetic water conc. (mg L <sup>-1</sup> ) | Diff. (%) | Actual groundwater conc. (mg L <sup>-1</sup> ) | Calculated values from the matrix | Artificial water conc. (mg L <sup>-1</sup> ) | Diff. (%) |
| TDS (gravimetric)        | 435.9                                          | -                                 | 411.5                                                | 5.6       | 1590.6                                         | -                                 | 1405.7                                       | 11.6      |
| TDS (calculated by ions) | 337.4                                          | 261.4                             | 310.6                                                | 7.9       | 1446                                           | 1171.1                            | 1321.5                                       | 8.6       |
| Chloride                 | 132                                            | 67.1                              | 112.0                                                | 15.2      | 435                                            | 222.7                             | 346                                          | 20.5      |
| Sodium                   | 33                                             | 23.1                              | 28.0                                                 | 15.2      | 169                                            | 111.2                             | 141                                          | 16.6      |
| Bicarbonate              | 27                                             | 27.0                              | 28.0                                                 | -3.7      | 115                                            | 114.8                             | 113                                          | 1.7       |
| Potassium                | 15                                             | 13.8                              | 13.3                                                 | 11.3      | 95                                             | 91.6                              | 93                                           | 2.1       |
| Fluoride                 | 1.5                                            | 1.5                               | 1.5                                                  | 1.3       | 3                                              | 2.94                              | 3.16                                         | -5.3      |
| Nitrate                  | 20                                             | 20.0                              | 21.2                                                 | -6.0      | 140                                            | 139.8                             | 139                                          | 0.7       |
| Calcium                  | 29                                             | 28.9                              | 26.4                                                 | 9.0       | 185                                            | 185.3                             | 181.5                                        | 1.9       |
| Zinc                     | 2                                              | 1.9                               | 1.9                                                  | 5.0       | 4                                              | 4.43                              | 4.1                                          | -2.5      |
| Magnesium                | 27                                             | 27.0                              | 24.5                                                 | 9.3       | 33                                             | 33.2                              | 32.4                                         | 1.8       |
| Sulfate                  | 30                                             | 30.1                              | 32.4                                                 | -8.0      | 220                                            | 219.4                             | 221.1                                        | -0.5      |
| Silica                   | 18                                             | 18.1                              | 18.6                                                 | -3.3      | 42                                             | 41.4                              | 42.3                                         | -0.7      |
| Manganese                | 2                                              | 1.9                               | 1.9                                                  | 7.5       | 3                                              | 3.4                               | 3.2                                          | -6.7      |
| Phosphates               | 0.91                                           | 1.1                               | 1.0                                                  | -6.6      | 2                                              | 1.06                              | 1.75                                         | 12.5      |
| Arsenate*                | 0.055                                          | -                                 | 0.057                                                | -3.6      | 0.2                                            | -                                 | 0.201                                        | -0.5      |

**Table S2.** Calculation of crystallite size using Scherrer's formula for MNPs.

| Peak no. | 2θ/degree | Peak maxima (2θ) | Peak max. (y <sub>2</sub> )/count | $y_1 + \frac{(y_2 - y_1)}{2}$ | 2θ high/degree | 2θ Low/degree | FWHM/radian | Peak max. (y <sub>2</sub> )/count | Crystallite size (nm) |
|----------|-----------|------------------|-----------------------------------|-------------------------------|----------------|---------------|-------------|-----------------------------------|-----------------------|
| 1.       | 220       | 30.27            | 425.31                            | 392.40                        | 29.15          | 29.73         | 0.010123    | 425.31                            | 14.20                 |
| 2.       | 311       | 35.41            | 557.01                            | 459.43                        | 34.62          | 35.11         | 0.008552    | 557.01                            | 17.03                 |
| 3.       | 400       | 43.02            | 396.80                            | 375.46                        | 42.40          | 42.95         | 0.009599    | 396.80                            | 15.54                 |
| 4.       | 511       | 57.24            | 414.01                            | 384.06                        | 56.72          | 57.43         | 0.012392    | 414.01                            | 12.75                 |
| 5.       | 440       | 62.75            | 428.87                            | 389.41                        | 62.14          | 62.83         | 0.012043    | 428.87                            | 13.49                 |

**Table S3.** Identification of peaks observed during FTIR spectroscopic analysis.

| Functional group/Surface moieties   | Peak(s) (cm <sup>-1</sup> ) |
|-------------------------------------|-----------------------------|
| Fe-O                                | 532 cm <sup>-1</sup>        |
|                                     | 635 cm <sup>-1</sup>        |
| Symm. SO <sub>4</sub> <sup>2-</sup> | 1023 cm <sup>-1</sup>       |

|                                                                                          |                                |
|------------------------------------------------------------------------------------------|--------------------------------|
| C=S, CC alicyclic, aliphatic chain vibrations, and SO <sub>4</sub> <sup>2-</sup> (asym.) | 1105 cm <sup>-1</sup>          |
| NH stretch                                                                               | 1628 cm <sup>-1</sup>          |
| OH stretch                                                                               | 3212 and 3424 cm <sup>-1</sup> |

**Table S4.** The final amount of constituents taken for synthetic water formulation.

| Compounds                                            | Molecular weight<br>(g mol <sup>-1</sup> ) | % contribution of each salt |             | Amount required (mg)<br>(for per litre of solution) |             |
|------------------------------------------------------|--------------------------------------------|-----------------------------|-------------|-----------------------------------------------------|-------------|
|                                                      |                                            | Location I                  | Location II | Location I                                          | Location II |
| ZnSO <sub>4</sub> . 7H <sub>2</sub> O                | 287.54                                     | 1.64                        | 1.06        | 8.4094                                              | 19.4786     |
| NaCl (anhy.)                                         | 58.45                                      | 0.70                        | 0.94        | 3.5765                                              | 17.2316     |
| CaCl <sub>2</sub> . 2H <sub>2</sub> O                | 147                                        | 20.74                       | 37.13       | 106.1647                                            | 679.4825    |
| MgCl <sub>2</sub> . 6H <sub>2</sub> O                | 203.3                                      | 44.05                       | 15.15       | 225.5227                                            | 277.3068    |
| NaHCO <sub>3</sub> . (anhy.)                         | 84.01                                      | 7.27                        | 8.64        | 37.2290                                             | 158.0520    |
| Na <sub>2</sub> SO <sub>4</sub> (anhy.)              | 142.04                                     | 6.09                        | 16.03       | 31.1764                                             | 293.4096    |
| NaF (anhy.)                                          | 41.99                                      | 0.65                        | 0.35        | 3.3450                                              | 6.4957      |
| MnSO <sub>4</sub> . 6H <sub>2</sub> O                | 169.06                                     | 1.16                        | 0.57        | 5.9271                                              | 10.3408     |
| K <sub>2</sub> SO <sub>4</sub> (anhy.)               | 174.26                                     | 1.02                        | 0.85        | 5.2023                                              | 15.5235     |
| Na <sub>3</sub> PO <sub>4</sub> . 12H <sub>2</sub> O | 380.12                                     | 0.86                        | 0.23        | 4.4103                                              | 4.2673      |
| KNO <sub>3</sub> (anhy.)                             | 101.1                                      | 6.38                        | 12.46       | 32.6809                                             | 227.9586    |
| Na <sub>2</sub> SiO <sub>3</sub> . 9H <sub>2</sub> O | 284.2                                      | 10.48                       | 6.69        | 53.6529                                             | 122.4339    |

**Table S5.** Optimal values of architecture weights and biases contribute to the adsorption process for the ANN model.

| The input I to hidden layer I |                     | IW <sup>(1,1)</sup> |         |         |         |         |         |          |         |
|-------------------------------|---------------------|---------------------|---------|---------|---------|---------|---------|----------|---------|
| Weight to layer               | LW <sup>(2,1)</sup> | [0.9991             | 6.3943  | -0.0779 | 0.37176 | -1.4427 | -0.1123 | 3.3727;  |         |
|                               |                     | -0.2944             | 0.58393 | 3.6067  | 3.0947  | -2.7787 | -2.0128 | 2.1517;  |         |
|                               |                     | -2.3273             | 0.2887  | 4.075   | 3.2756  | -1.2876 | 0.61371 | 0.25236; |         |
|                               |                     | -0.0161             | 4.111   | 1.1027  | 1.2377  | -0.2901 | 1.6878  | 1.2626;  |         |
|                               |                     | 2.185               | 3.9435  | 1.0082  | 0.43236 | -0.8532 | -2.811  | 1.9592;  |         |
|                               |                     | -2.2928             | -0.9783 | -3.2384 | -0.2984 | -0.8305 | -2.0942 | 0.30994; |         |
|                               |                     | -1.0901             | 0.12743 | 1.9988  | 0.19748 | 3.1668  | -1.0989 | -1.0024; |         |
|                               |                     | 0.66173             | -1.1256 | 2.2898  | -1.0681 | -1.5092 | 1.5585  | -1.2733] |         |
| Bias to layer I               | b <sup>(1)</sup>    | [-2.2556            | -0.9860 | -0.6726 | 0.19133 | 2.5928  | -0.2696 | -0.3228  | 0.4914] |
| Bias to layer II              |                     | [-0.036;            |         |         |         |         |         |          |         |
|                               |                     | -4.5493;            |         |         |         |         |         |          |         |
|                               |                     | 1.2352;             |         |         |         |         |         |          |         |
|                               |                     | 0.15689;            |         |         |         |         |         |          |         |
|                               |                     | 0.95491;            |         |         |         |         |         |          |         |
|                               |                     | -0.5649;            |         |         |         |         |         |          |         |
|                               |                     | -2.8714;            |         |         |         |         |         |          |         |
|                               |                     | 4.3622]             |         |         |         |         |         |          |         |
|                               |                     | [-0.965]            |         |         |         |         |         |          |         |

## Figures

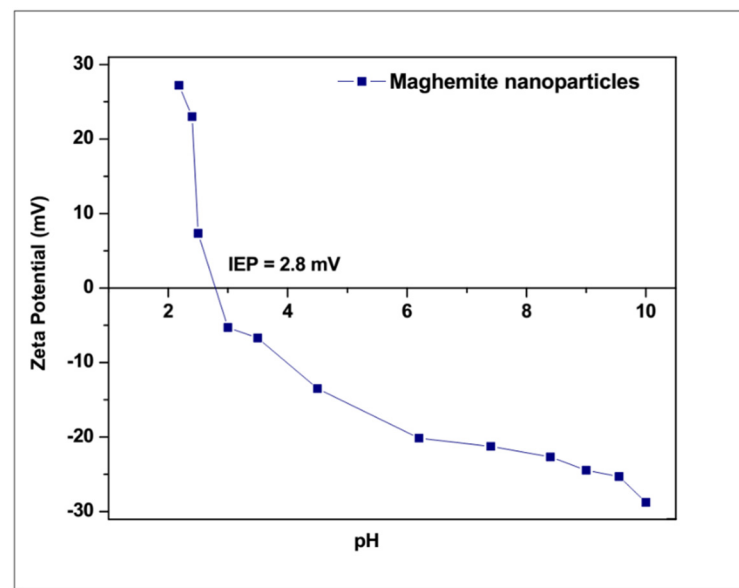

Figure S1. The zeta potential measurement of maghemite nanoparticles.
